# Supplementary material
Source: publisher site journal article supplement (https://www.dovepress.com/article/217098)
Supplement: Supplementary file 1 [file get_supplementary_file.php]

**Supplementary materials**
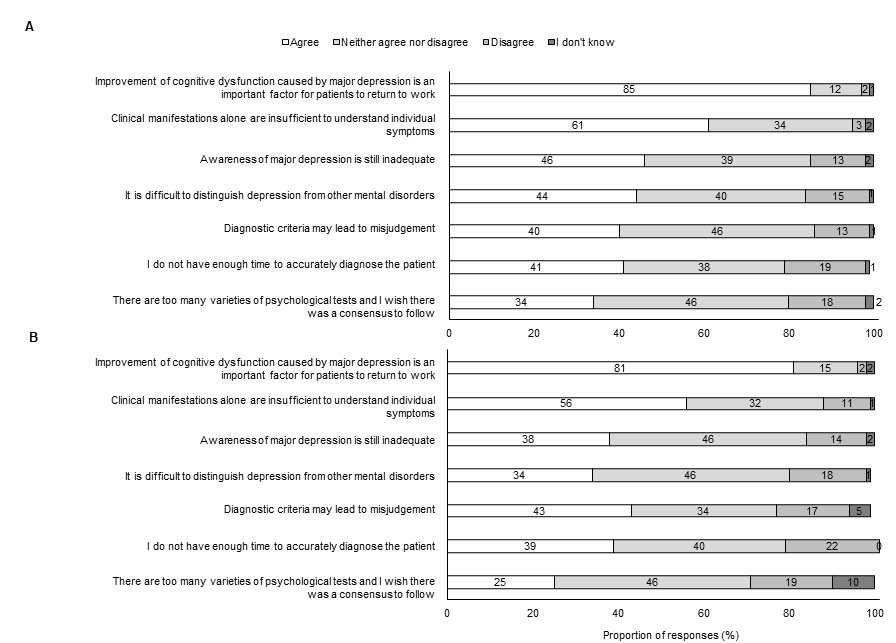


### Figure S1 Challenges in the clinical diagnosis and management of MDD by physician facility.

**Notes:** The question addressed was:Regarding the medical care of major depression, please provide us with how much you agree or disagree with the following statements. Analyses were conducted on data from question 28 (*Table S1*).

(**A**) Hospital physician and (**B**) general practitioner perspectives.

**Abbreviation:** MDD, major depressive disorder.

**Table S1** Sample questionnaire [English translation]

**Audience:**

Physicians who have selected ‘Psychiatry (O01)’ or ‘Psychosomatic Medicine (A 82)’ as specialities in the database held by Japan Altmark MDB.

**Criteria:**

Physicians affiliated with or are specialists of the department of psychiatry or psychosomatic medicine

Physicians who have treated more than 30 patients with major depression (major depressive disorder) in the past month

**Samples:**

300 physicians

**Survey Content:**

| **Research subject** | | Survey item | Q Number |
| --- | --- | --- | --- |
| A) | **Does the clinical challenges around major depression differ depending on the institution, age, specialty, and affiliation of the physician?** | - What are the challenges in treating major depression? [Awareness Survey: Multiple responses available] | Q28 |
| - Main affiliation [University, hospital (categorized by the number of beds), clinics, or others] | Q9,10,11 |
| - Their graduate medical department (Select from psychiatry, respiratory medicine, etc.) | Q5 |
| - Are they a member of a psychological society and/or association? | Q7,8 |
| B) | **Are there no unified methods for diagnosing major depression?** | - Do they use DSM -5/ICD -10 as diagnostic criteria for major depression? | Q12,13 |
| - Tests used in diagnosis of major depression (to exclude organ diseases and physical diseases) | Q14 |
| - Are imaging tests performed? | Q14 |
| C) | **Are phycians not utilizing tools for diagnosing symptoms of major depression?** | - Do they use tools for diagnosing major depression? | Q15 |
| - Are mental symptoms of major depression assessed (by using SDS, BDI, HAM-D, QIDS-J, etc.)? | Q15 |
| D) | **Are few doctors referring to the guidelines?** | - Are depression guidelines used? | Q12,13 |
| E) | **Are physicians examining patients with cognitive impairment in mind?** | - What are the other measures and tools for the evaluation of major depression (Differentiation of dementia, assessment of cognitive function, and assessment of social function) | Q15,16,17 |
|  | Other | - Consultation duration (Acute phase and maintenance phase) | Q18 |
| - What is the duration of initial consulation? How much time would you ideally need? | Q19 |
| - What is the duration of the most recent i.e. follow-up consultation? How much time would you ideally need? | Q19 |
| - How many patients do you seen in a months? Of those, how many patients have major depression? | Q2 |
| - How many patients have treatment-resistant major depression? | Q24 |
| - How often does the diagnosis change? | Q20 |
| - What is the rate of non-drug therapy alone? | Q23 |
| - What proportion of patients recieve counseling from clinical psychologists? How long does this continue for? | Q21,22 |
| - Explaining the rationale of drug treatment at the start of medication? | Q25 |
| - About the combined use of e.g. BZ treatment | NA |
| - With respect to automobiles | NA |
| - Combination of physical disorders | Q14 |
| - How to maintain medication adherence | Q26,27 |

**The following replicates the online questionnaire:**

**Survey examining major depression (major depressive disorder)**

| 【Inclusion criteria】  ○ You are affiliated with a department of or are a specialist in psychiatry or psychosomatic medicine  ○ You consult more than 30 patients with major depression in 1 month  【Scope of disclosure, etc】In accordance with the Act on the Protection of Personal Information and its guidelines, only the aggregate results for which the respondents could not be identified were disclosed to the scope（■）below。  □ 1. Disclosed only to our company and the company who has requested this survey to be carried out  □ 2. May be disclosed to m3.com members (or in the m3.com site)  □ 3. Disclosure may be restricted to healthcare professionals.  ■ 4. Open to the public  【How to answer the questionnaire】  The data of the answered pages will be automatically saved even if you close your browser whilst completing the questionnaire. You will be able to resume answering from the unanswered pages the next time you visit as long as it is prior to the deadline. |
| --- |

【Information on adverse events】

In the course of responding to this market survey questionnaire, Our Company is requested by our client company to provide information on any adverse events (side effects, etc.) identified for a particular patient, and related to the product of the client company. Therefore, we will ask you again at a later date if it is OK to inform our client of your name and affiliation, only if we need to ask you for more detailed information (e.g. in cases of serious adverse events, etc.).

If you agree with the above, please select ‘Agree’ to proceed with the survey.

○Agree ○Disagree

**Now, click ‘Next’**

Next

＊＊＊＊＊PAGE END＊＊＊＊＊

- SA (single answer)
- ‘Disagree’ → S/O (screen out)

Please choose one of the following.

1. I am currently affiliated with a department of or advertise my speciality as psychiatry
2. I am currently affiliated with a department of or advertise my speciality as psychosomatic medicine
3. Other

＊＊＊＊＊PAGE END＊＊＊＊＊

- SA
- ‘Other’ → S/O

Please provide the total number of patients treated in a month, based on your medical records.

Please also provide the number of patients with major depression consulted in the past month.

| Total number of patients treated per month | Q2-1 patients／month |
| --- | --- |
|  | ⇩ |
| Number of major depression patients treated per month | Q2-2 patients／month |

＊＊＊＊＊PAGE END＊＊＊＊＊

- NA (numerical answer)
- Total number of major depressive patients per month ≤ total number of patients per month
- Number of patients with major depression in one month < 30 → S/O

**About yourself.**

Please select your sex.

1. Male
2. Female

＊＊＊＊＊PAGE END＊＊＊＊＊

- SA

Please select your age group.

1. 29 years of age, or younger
2. 30～39 years old
3. 40～49 years old
4. 50～59 years old
5. 60 years and older

＊＊＊＊＊PAGE END＊＊＊＊＊

- SA

Please select the department you graduated from.

1. Psychiatry
2. Psychosomatic medicine
3. Other（　　　　　）

＊＊＊＊＊PAGE END＊＊＊＊＊

- SA

Please select the number of years of your experience in psychiatric treatment.

1. Less than 3 years
2. 3～9 years
3. 10～19 years
4. 20～29 years
5. 30 years or longer

＊＊＊＊＊PAGE END＊＊＊＊＊

- SA

Please select the associations or societies of neuropsychiatry you are affiliated with **(select all that apply)**.

1. Japanese Society of Psychiatry and Neurology
2. Japanese Society of Mood Disorders
3. Japanese Association for Behavioral and Cognitive Therapies
4. Japanese Society of Clinical Neuropsychopharmacology
5. Japanese Society of Neuropsychopharmacology
6. Other neuropsychiatric societies
7. Not affiliated with a neuropsychiatric society

＊＊＊＊＊PAGE END＊＊＊＊＊

- MA (multiple answers)
- ‘Not affiliated with a neuropsychiatric society’ is exclusive

Please select the most appropriate option below.

1. I am a registered specialist of the Japanese Society of Psychiatry and Neurology
2. I am not a registered specialist of the Japanese Society of Psychiatry and Neurology

＊＊＊＊＊PAGE END＊＊＊＊＊

- SA
- For those who answered Q7=1

Please select the main facility you are currently affiliated with.

1. University hospital
2. Psychiatric hospital
3. General hospitals other than the above
4. Clinic
5. Other（　　　　　）

＊＊＊＊＊PAGE END＊＊＊＊＊

- SA

Please select the total number of beds in your current main facility.

1. Less than 19 beds
2. 20～99 beds
3. 100～199 beds
4. 200～299 beds
5. 300～499 beds
6. 500～799 beds
7. 800 or more beds

＊＊＊＊＊PAGE END＊＊＊＊＊

- SA

Please select the location of your current main facility.

1. Urban/Urban area
2. Other

＊＊＊＊＊PAGE END＊＊＊＊＊

- SA

**About guidelines.**

Are you aware of the following guidelines?

|  |  | No | Yes |
| --- | --- | --- | --- |
| DSM-5／ICD-10 | ➡ | 1 | 2 |
| Guideline for the treatment of depression, published by the Japanese Society of Mood Disorders | ➡ | 1 | 2 |
| APA (American Psychiatric Association) | ➡ | 1 | 2 |
| TMAP (Texas Medication Algorithm Project) | ➡ | 1 | 2 |
| NICE (The National Institute for Health and Care Excellence) | ➡ | 1 | 2 |
| WFSBP (World Federation of Societies of Biological Psychiatry) | ➡ | 1 | 2 |
| CANMAT (Canadian Network for Mood and Anxiety Treatments) | ➡ | 1 | 2 |

＊＊＊＊＊PAGE END＊＊＊＊＊

- SA
- Random (i.e. the order of items are displayed at random)

Do you refer to the following guidelines when diagnosing, treating, and/or evaluating major depression?

|  |  | No | Yes  （**please select all that apply**） | | |
| --- | --- | --- | --- | --- | --- |
|  |  | DIAGNOSIS | TREATMENT | EVALUATION |
| DSM-5／ICD-10 | ➡ | 1 | 2 | 3 | 4 |
| Guideline for the treatment of depression, published by the Japanese Society of Mood Disorders | ➡ | 1 | 2 | 3 | 4 |
| APA (American Psychiatric Association) | ➡ | 1 | 2 | 3 | 4 |
| TMAP (Texas Medication Algorithm Project) | ➡ | 1 | 2 | 3 | 4 |
| NICE (The National Institute for Health and Care Excellence) | ➡ | 1 | 2 | 3 | 4 |
| WFSBP (World Federation of Societies of Biological Psychiatry) | ➡ | 1 | 2 | 3 | 4 |
| CANMAT (Canadian Network for Mood and Anxiety Treatments) | ➡ | 1 | 2 | 3 | 4 |

＊＊＊＊＊PAGE END＊＊＊＊＊

- MA
- Same order as in Q12
- Shown only to those that answered ‘Yes’ in Q12
- ‘No’ is exclusive

**About the diagnosis of major depression.**

In how many patients do you confirm and/or perform the following tests when you are **diagnosing** mood disorders?

|  |  | Few patients | Some patients | Most patients |
| --- | --- | --- | --- | --- |
| Basic physiological assessments (height, weight, and vital signs) | ➡ | 1 | 2 | 3 |
| Neurological assessments | ➡ | 1 | 2 | 3 |
| History of mental illness | ➡ | 1 | 2 | 3 |
| History of physical illness | ➡ | 1 | 2 | 3 |
| **Family** history of mental illness | ➡ | 1 | 2 | 3 |
| Patient background (development, academic, and employment history, and marital status) | ➡ | 1 | 2 | 3 |
| Personality traits and habits before disease onset | ➡ | 1 | 2 | 3 |
|  |  | Few patients | Some patients | Most patients |
| State prior to disease onset | ➡ | 1 | 2 | 3 |
| Stress evaluation | ➡ | 1 | 2 | 3 |
| Sleep patterns | ➡ | 1 | 2 | 3 |
| Blood and/or urine analysis | ➡ | 1 | 2 | 3 |
| Other physiological tests (electrocardiogram, electroencephalogram) | ➡ | 1 | 2 | 3 |
| Imaging (CT, MRI and/or SPECT) | ➡ | 1 | 2 | 3 |
| Psychological tests | ➡ | 1 | 2 | 3 |

＊＊＊＊＊PAGE END＊＊＊＊＊

- SA
- Random

Are you aware of the following psychological tests?

Do you perform these tests in clinical practice, when diagnosisng a mood disorder?

|  |  | No | Yes | |
| --- | --- | --- | --- | --- |
|  |  | Not performed at time of diagnosis | May be performed at diagnosis |
| HAM-D (Hamilton Depression Rating scale) | ➡ | 1 | 2 | 3 |
| SDS (Zung Self-rating Depression Scale) | ➡ | 1 | 2 | 3 |
| MADRS (Montgomery Åsberg Depression Rating Scale) | ➡ | 1 | 2 | 3 |
| QIDS-J (Quick Inventory of Depressive Symptomatology-Japan) | ➡ | 1 | 2 | 3 |
| YMRS (Young Mania Rating Scale) | ➡ | 1 | 2 | 3 |
| DSST (Digit Symbol Subsitution Test) | ➡ | 1 | 2 | 3 |
| HDS-R (Hasegawa Dementia Scale-Revised) | ➡ | 1 | 2 | 3 |
| MMSE (Mini-Mental State Examination) | ➡ | 1 | 2 | 3 |

＊＊＊＊＊PAGE END＊＊＊＊＊

- SA
- Random

**At the time of major depression diagnosis**, in how many patients do you examine the following symptoms?

|  |  | Rarely examined | Examined in some patients | Examined in most patients |
| --- | --- | --- | --- | --- |
| Feeling low (sadness) | ➡ | 1 | 2 | 3 |
| Loss of interest (lose interest in things) | ➡ | 1 | 2 | 3 |
| Loss of pleasure (cannot enjoy activities and/or things) | ➡ | 1 | 2 | 3 |
| Loss of appetite | ➡ | 1 | 2 | 3 |
| Weight gain | ➡ | 1 | 2 | 3 |
| Sleep disorders (cannot fall asleep well, cannot sleep well, wake up too early in the morning) | ➡ | 1 | 2 | 3 |
| Feeling irritated (irritable or restless) | ➡ | 1 | 2 | 3 |
| Decreased mental function (reduced processing speed) | ➡ | 1 | 2 | 3 |
| Decreased motility (slow movement of the body) | ➡ | 1 | 2 | 3 |
|  |  | Rarely examined | Examined in some patients | Examined in most patientsoka |
| Fatigue, decreased energy (easily fatigued and lethargic) | ➡ | 1 | 2 | 3 |
| Decreased libido | ➡ | 1 | 2 | 3 |
| Feelings of guilt and worthlessness (that you are in the wrong or worthless) | ➡ | 1 | 2 | 3 |
| Reduced concentration (it becomes difficult to concentrate on thoughts) | ➡ | 1 | 2 | 3 |
| Reduced ability to think (it becomes difficult to think about things) | ➡ | 1 | 2 | 3 |
| Difficulty in making decisions (unable to make plans or to decide) | ➡ | 1 | 2 | 3 |
| Forgetfulness (unable to remember things) | ➡ | 1 | 2 | 3 |
| Physical symptoms (abdominal discomfort, bowel dysfunction, fatigue, and general pain) | ➡ | 1 | 2 | 3 |
| Suicidal ideation | ➡ | 1 | 2 | 3 |

＊＊＊＊＊PAGE END＊＊＊＊＊

- SA
- Random

Which of the following **best describes** the **cognitive impairment** associated with major depression in older people?

1. Cognitive impairment is differentiated from dementia at diagnosis
2. Although accurate identification is not possible, cognitive impairment is recognized as a symptom of major depression
3. Cognitive impairment is not taken into consideration in older patients at diagnosis

＊＊＊＊＊PAGE END＊＊＊＊＊

- SA

**About the examination of major depression.**

Please select the **most common** interval between consultations for your patients with major depression.

|  | acute phase | maintenance phase |
| --- | --- | --- |
|  | ⇩ | ⇩ |
| At least once a week | 1 | 1 |
| Once every 2 weeks | 2 | 2 |
| Once a month | 3 | 3 |
| Once every two months | 4 | 4 |
| Once every 3 months, or less often | 5 | 5 |

＊＊＊＊＊PAGE END＊＊＊＊＊

- SA

What is the **most common** consultation duration for your patients with major depression?

What is the **ideal** consultation duration for an accurate diagnosis and evaluation?

*Please think about the time in the examination room (excluding examinations outside the examination room, for e.g. laboratory tests, etc.).

|  | Initial consultation | | Follow-up consultation | |
| --- | --- | --- | --- | --- |
|  | most common duration | ideal | most common duration | ideal |
|  | ⇩ | ⇩ | ⇩ | ⇩ |
| Approximately 1 minute | 1 | 1 | 1 | 1 |
| Approximately 3 minutes | 2 | 2 | 2 | 2 |
| Approximately 5 minutes | 3 | 3 | 3 | 3 |
| Approximately 10 minutes | 4 | 4 | 4 | 4 |
| Approximately 15 minutes | 5 | 5 | 5 | 5 |
| Approximately 20 minutes | 6 | 6 | 6 | 6 |
| Approximately 30 minutes | 7 | 7 | 7 | 7 |
| Approximately 45 minutes | 8 | 8 | 8 | 8 |
| >1 hour | 9 | 9 | 9 | 9 |

＊＊＊＊＊PAGE END＊＊＊＊＊

- SA
- Ideal ≥ most common duration

Please provide the percentage of patients whose diagnosis changed to mental disorders **other than major depression** during diagnosis (if the number of patients that you diagnosed with major depression = 100%).

| Patients you diagnosed with major depression | 100% |
| --- | --- |
|  | ⇩ |
| Rate of change in diagnosis to mental disorders other than major depression | Q20% |

＊＊＊＊＊PAGE END＊＊＊＊＊

- NA
- Proportion of patients whose diagnosis converts to a mental disorder other than major depression ≤ 100

**About the treatment of major depression.**

How many patients are receiving counseling (clinical psychological interviews) from clinical psychologists?

| Number of patients with major depression per month | Q2-2 answer repeated／month |
| --- | --- |
|  | ⇩ |
| Number of patients receiving clinical psychologist counseling (clinical psychological interviews) | Q21patients／month |

- There are no clinical psychologists in the institution.

＊＊＊＊＊PAGE END＊＊＊＊＊

- NA or MA
- Number of patients receiving counseling from clinical psychologists ≤ total number of patients with major depression seen per month

Until when will counseling from clinical psychologist (clinical psychological interview) be available to your patients?

Please choose **the most common situation.**

1. Until the end of the acute phase
2. Until the end of the recovery period
3. Counseling is conducted during the maintenance phase as well
4. I don't know

＊＊＊＊＊PAGE END＊＊＊＊＊

- SA
- Shown to those who responded with **other than** ‘There are no clinical psychologists in the institution.’ at Q21

How many patients are prescribed antidepressants?

| Number of major depression patients per month | Q2-2answer repeated patients／month |
| --- | --- |
|  | ⇩ |
| Number of patients prescribed antidepressants | Q23  patients／month |

＊＊＊＊＊PAGE END＊＊＊＊＊

- NA
- Number of patients prescribed antidepressants ≤ total number of patients with major depression seen per month

How many patients are treatment-resistant?

| Number of major depression patients per month | Q2-2answer repeated patients／month |
| --- | --- |
|  | ⇩ |
| Number of patients who are treatment-resistant | Q24 patients／month |

(Reference) Number of patients prescribed antidepressants: **Q23 answer repeated patients/month**

＊＊＊＊＊PAGE END＊＊＊＊＊

- NA
- Number of refractory patients ≤ total number of patients with major depression seen per month

Who **primarily** educates the patient about their medication at the start of antidepressant treatment?

Please select the most applicable option from below.

1. Doctor (you)
2. Pharmacist
3. Nurse
4. Other（　　　　　）

＊＊＊＊＊PAGE END＊＊＊＊＊

- SA

What percentage of patients demonstrate good adherence to their medication? (If 100% was the number of patients who start antidepressant treatment).

| Patients who start antidepressant treatment | 100% |
| --- | --- |
|  | ⇩ |
| Rate of good adherence | Q26% |

- I don't know/can't guess

＊＊＊＊＊PAGE END＊＊＊＊＊

- NA or SA
- Good adherence ≤ 100

Does any of the following content apply to you?

|  |  | No | Yes |
| --- | --- | --- | --- |
| I know the number of concomitant drugs taken by my patient including medication for other diseases | ➡ | 1 | 2 |
| Combinations of antidepressants are prescribed when antidepressant monotherapy is not effective | ➡ | 1 | 2 |
| Prescriptions are changed according to the nature of work and/or the whether the patient drives a vehicle | ➡ | 1 | 2 |
| Check for unused antidepressants at consultation | ➡ | 1 | 2 |
| Augmentation therapy (Antipsychotic drugs, lithium, etc.) is used to treat major depression when antidepressants alone are not effective | ➡ | 1 | 2 |

＊＊＊＊＊PAGE END＊＊＊＊＊

- Random

**Finally, please provide us with your opinions.**

Regarding the medical care of major depression, please provide us with how much you agree or disagree with the following statements.

|  |  | Disagree | Neither agree nor disagree | Agree |  | I don’t know |
| --- | --- | --- | --- | --- | --- | --- |
| It is difficult to distinguish major depression from other mental disorders | ➡ | 1 | 2 | 3 |  | 4 |
| I do not have enough time to accurately diagnose the patient | ➡ | 1 | 2 | 3 |  | 4 |
| There are too many varieties of psychological tests, and I wish there was a consensus to follow | ➡ | 1 | 2 | 3 |  | 4 |
| Diagnostic criteria may lead to misjudgment | ➡ | 1 | 2 | 3 |  | 4 |
| Clinical manifestations alone are insufficient to understand individual symptoms | ➡ | 1 | 2 | 3 |  | 4 |
| Awareness of major depression is still inadequate | ➡ | 1 | 2 | 3 |  | 4 |
| Improvement of cognitive dysfunction caused by major depression is an important factor for patients to return to work | ➡ | 1 | 2 | 3 |  | 4 |

＊＊＊＊＊PAGE END＊＊＊＊＊

- Random

**Table S2** Sample questionnaire [Original]

**配信対象：**

日本アルトマーク社のMDBで診療科目に「精神科（O01）」「心療内科（A82）」が含まれる医師

**抽出条件：**

精神科に所属している／精神科を標榜している、もしくは、心療内科に所属している／診療科を標榜している

1ヶ月に大うつ病患者を30人以上診ている

**サンプル数：**

300件

**調査内容：**

| 調査課題 | | 調査項目 | Q番号 |
| --- | --- | --- | --- |
| A) | **大うつ病の診療課題は医師の施設、年齢、専門性、学会所属により異なるのではないか** | - うつ病の診療における課題は何か【意識調査：複数回答用意】 | Q28 |
| - 主な所属施設は【大学・病院（ベッド数で判断）・診療所・その他】のどれか | Q9,10,11 |
| - 出身医局について（精神科・呼吸器内科など選別） | Q5 |
| - 精神系学会にはどこに所属しているか | Q7,8 |
| B) | **大うつ病の診断方法については統一されていないのではないか** | - うつ病の診断基準はDSM-5/ICD-10を活用しているか | Q12,13 |
| - うつ病の診断にあたって行う検査について（器質疾患の除外、身体疾患の除外） | Q14 |
| - 画像検査を行うか | Q14 |
| C) | **大うつ病の評価ツールを用いている事は少ないのではないか** | - うつ病の診断に用いるツールはあるか | Q15 |
| - うつ病の精神症状の評価を行っているか（SDS、BDI、HAM-D、QIDS-Jなど） | Q15 |
| D) | **ガイドラインを参考にしている医師は少ないのではないか** | - うつ病のガイドラインを活用しているか | Q12,13 |
| E) | **認知機能障害を意識した診察はあまり為されていないのではないか** | - うつ病のその他の評価とその方法・ツール（認知症の鑑別、認知機能の評価、社会機能の評価） | Q15,16,17 |
|  | その他 | - 受診間隔（急性期、維持期） | Q18 |
| - 初診の患者さんに対する診察時間はどのくらいか？本当はどのくらい必要か？ | Q19 |
| - 最新の患者さんに対する診察時間はどれくらいか？本来はどのくらい必要か？ | Q19 |
| - 総患者数は月何人か、その中でMDDは何人くらいいるか | Q2 |
| - 治療抵抗性のうつ病患者数はどれほどか | Q24 |
| - 診断が途中で変更される割合はどれくらいか？ | Q20 |
| - 非薬物療法のみで治療される割合はどれくらいか？ | Q23 |
| - 臨床心理士によるカウンセリングを行う割合はどれくらいか？いつまで行うか？ | Q21,22 |
| - 薬物療法開始時の説明 | Q25 |
| - BZなどの併用に関して | NA |
| - 自動車運転に関して | NA |
| - 身体疾患の合併について | Q14 |
| - 薬物アドヒアランスを保つための工夫について | Q26,27 |

**以下Web画面：**

**大うつ病（大うつ病性障害）に関するアンケート**

| 【回答者条件】  ○ 精神科に所属している／精神科を標榜している、もしくは、心療内科に所属している／心療内科を標榜している  ○ 1ヶ月に大うつ病の患者を30人以上診ている  【開示範囲等】 個人情報保護法及びそのガイドラインに準拠し、回答者個人を特定できない集計結果のみを下記の範囲（■）に開示。  □ 1.弊社ならびに本調査依頼主にのみ開示  □ 2.m3.com会員（またはm3.comサイト内）まで開示することがあります  □ 3.医療関係者に限定して開示することがあります  ■ 4.一般公開  【回答方法】  アンケート締め切り前でしたら、途中でブラウザを閉じて頂いても、回答済のページのデータは自動保存されており、次回アクセス時は未回答のページから回答を再開することができます。 |
| --- |

【有害事象情報について】

当社は依頼元の企業より、この市場調査アンケートにご回答いただく中で、特定の患者様の有害事象（副作用など）が確認され、それが依頼元企業の製品であった場合には、その情報を報告するよう求められています。したがって、より詳細な情報について先生にお伺いする必要が生じた場合（有害事象が重篤であった等）についてのみ、先生のお名前とご所属を依頼企業にお伝えしても良いか否かを後日改めてお尋ねいたします。

上記の内容に同意いただける場合は、「同意する」を選んでアンケートへお進みください。

○同意する ○同意しない

**それでは「次へ」をクリックしてください。**

次へ

＊＊＊＊＊PAGE END＊＊＊＊＊

・SA

・「同意しない」　→S/O

あてはまるものをお選びください。

1. 現在、精神科に所属している／精神科を標榜している
2. 現在、心療内科に所属している／心療内科を標榜している
3. 上記以外

＊＊＊＊＊PAGE END＊＊＊＊＊

・SA

・「上記以外」　→スクリーンアウト

1ヶ月の総診療患者数を、カルテベースの実人数でお答えください。

そのうち、大うつ病の患者数をお答えください。

| 1ヶ月の総診療患者数 | Q2-1人／月 |
| --- | --- |
|  | ⇩ |
| 1ヶ月の大うつ病患者数 | Q2-2人／月 |

＊＊＊＊＊PAGE END＊＊＊＊＊

・NA

・1ヶ月の大うつ病患者数≤1ヶ月の総診療患者数

・1ヶ月の大うつ病患者数<30人　→スクリーンアウト

**先生ご自身について伺います。**

性別をお選びください。

1. 男性
2. 女性

＊＊＊＊＊PAGE END＊＊＊＊＊

・SA

年齢をお選びください。

1. 29歳以下
2. 30～39歳
3. 40～49歳
4. 50～59歳
5. 60歳以上

＊＊＊＊＊PAGE END＊＊＊＊＊

・SA

出身医局の所属診療科をお選びください。

1. 精神科
2. 心療内科
3. その他（　　　　　）

＊＊＊＊＊PAGE END＊＊＊＊＊

・SA

精神疾患の診療経験年数をお選びください。

1. 3年未満
2. 3～9年
3. 10～19年
4. 20～29年
5. 30年以上

＊＊＊＊＊PAGE END＊＊＊＊＊

・SA

所属している精神神経科系の学会をお選びください。（**あてはまるものすべて**）

1. 日本精神神経学会
2. 日本うつ病学会
3. 認知行動療法学会
4. 日本臨床精神神経薬理学会
5. 日本神経精神薬理学会
6. その他の精神神経科系の学会
7. 精神神経科系の学会に所属していない

＊＊＊＊＊PAGE END＊＊＊＊＊

・MA

・「精神神経科系の学会に所属していない」は排他

あてはまるものをお選びください。

1. 日本精神神経学会専門医である
2. 日本精神神経学会専門医ではない

＊＊＊＊＊PAGE END＊＊＊＊＊

・SA

・対象はQ7=1

現在の主な所属施設をお選びください。

1. 大学病院
2. 精神科病院
3. 上記以外の一般病院
4. 診療所
5. その他（　　　　　）

＊＊＊＊＊PAGE END＊＊＊＊＊

・SA

現在の主な所属施設**全体**の病床数をお選びください。

1. 19床未満
2. 20～99床
3. 100～199床
4. 200～299床
5. 300～499床
6. 500～799床
7. 800床以上

＊＊＊＊＊PAGE END＊＊＊＊＊

・SA

現在の主な所属施設の立地をお選びください。

1. 都市部／市街地
2. 上記以外

＊＊＊＊＊PAGE END＊＊＊＊＊

・SA

**ガイドラインについて伺います。**

以下のガイドラインについて、あてはまるものをお選びください。

|  |  | 知らない | 知っている | |
| --- | --- | --- | --- | --- |
| DSM-5／ICD-10 | ➡ | 1 | 2 | |
| 日本うつ病治療ガイドライン | ➡ | 1 | 2 | |
| APA（アメリカ精神医学会） | ➡ | 1 | 2 | |
| TMAP（テキサス精神薬理アルゴリズム計画） | ➡ | 1 | 2 | |
| NICE（国立医療技術評価機構） | ➡ | 1 | 2 | |
| WFSBP（生物学的精神医学会世界連合） | ➡ | 1 | 2 | |
| CANMAT（カナダ気分・不安治療ネットワーク） | ➡ | 1 | 2 | |
|  |  | 知らない | 知っている |

＊＊＊＊＊PAGE END＊＊＊＊＊

・SA

・ランダム

以下のガイドラインについて、大うつ病の診断・治療・評価の際に参考にしていますか？

|  |  | 参考にしていない | 参考にしている  （**あてはまるものすべてお選びください**） | | | |
| --- | --- | --- | --- | --- | --- | --- |
|  |  | 診断 | | 治療 | 評価 |
| DSM-5／ICD-10 | ➡ | 1 | 2 | | 3 | 4 |
| 日本うつ病治療ガイドライン | ➡ | 1 | 2 | | 3 | 4 |
| APA（アメリカ精神医学会） | ➡ | 1 | 2 | | 3 | 4 |
| TMAP（テキサス精神薬理アルゴリズム計画） | ➡ | 1 | 2 | | 3 | 4 |
| NICE（国立医療技術評価機構） | ➡ | 1 | 2 | | 3 | 4 |
| WFSBP（生物学的精神医学会世界連合） | ➡ | 1 | 2 | | 3 | 4 |
| CANMAT（カナダ気分・不安治療ネットワーク） | ➡ | 1 | 2 | | 3 | 4 |
|  |  | 参考にしていない | 参考にしている  （**あてはまるものすべてお選びください**） | | | |
|  |  | 診断 | 治療 | | 評価 |

＊＊＊＊＊PAGE END＊＊＊＊＊

・MA

・Q12と同じ並び順

・Q12「知っている」のみ表示

・「参考にしていない」は排他

**大うつ病の診断について伺います。**

実臨床において、気分障害の**診断時**に以下の内容をどの程度の患者さんに確認／実施していますか？

|  |  | ほとんど確認／実施していない | 一部の患者に確認／実施している | ほぼ全例に確認／実施している |
| --- | --- | --- | --- | --- |
| 理学所見（身長・体重・バイタルサイン） | ➡ | 1 | 2 | 3 |
| 神経学的所見 | ➡ | 1 | 2 | 3 |
| 精神疾患の既往歴 | ➡ | 1 | 2 | 3 |
| 身体疾患の既往歴 | ➡ | 1 | 2 | 3 |
| 精神疾患の**家族**歴 | ➡ | 1 | 2 | 3 |
| 生活歴（発達歴・学歴・職歴・婚姻歴） | ➡ | 1 | 2 | 3 |
| 病前のパーソナリティ傾向 | ➡ | 1 | 2 | 3 |
|  |  | ほとんど確認／実施していない | 一部の患者に確認／実施している | ほぼ全例に確認／実施している |
| 病前の適応状態の確認 | ➡ | 1 | 2 | 3 |
| ストレス因子の評価 | ➡ | 1 | 2 | 3 |
| 睡眠の状態 | ➡ | 1 | 2 | 3 |
| 血液・尿検査 | ➡ | 1 | 2 | 3 |
| 生理学的検査（心電図、脳波） | ➡ | 1 | 2 | 3 |
| 画像検査（CT・MRI・SPECT） | ➡ | 1 | 2 | 3 |
| 心理検査 | ➡ | 1 | 2 | 3 |
|  |  | ほとんど確認／実施していない | 一部の患者に確認／実施している | ほぼ全例に確認／実施している |

＊＊＊＊＊PAGE END＊＊＊＊＊

・SA

・ランダム

以下の心理検査をご存知ですか？

また、実臨床において、気分障害の**診断時**に実施することはありますか？

|  |  | 知らない | 知っている | |
| --- | --- | --- | --- | --- |
|  |  | 診断時に実施することはない | 診断時に実施することがある |
| HAM-D（ハミルトンうつ病評価尺度） | ➡ | 1 | 2 | 3 |
| SDS（うつ性自己評価尺度） | ➡ | 1 | 2 | 3 |
| MADRS（モンゴメリ・アスベルグうつ病評価尺度） | ➡ | 1 | 2 | 3 |
| QIDS-J（簡易抑うつ症状尺度） | ➡ | 1 | 2 | 3 |
| YMRS（ヤング躁病評価尺度） | ➡ | 1 | 2 | 3 |
| DSST（数値符号置換検査） | ➡ | 1 | 2 | 3 |
| HDS-R（改訂長谷川式簡易知能評価尺度） | ➡ | 1 | 2 | 3 |
| MMSE（ミニメンタルステイト検査） | ➡ | 1 | 2 | 3 |
|  |  | 知らない | 知っている | |
|  |  | 診断時に実施することはない | 診断時に実施することがある |

＊＊＊＊＊PAGE END＊＊＊＊＊

・SA

・ランダム

実臨床において、大うつ病の**診断時**に以下の症状をどの程度の患者さんに確認していますか？

|  |  | ほとんど確認していない | 一部の患者に確認している | ほぼ全例に確認している |
| --- | --- | --- | --- | --- |
| 気分の落ち込み（悲しい気持ち） | ➡ | 1 | 2 | 3 |
| 興味の喪失（物事に興味を持てなくなる） | ➡ | 1 | 2 | 3 |
| 喜びの喪失（楽しむことができなくなる） | ➡ | 1 | 2 | 3 |
| 食欲の低下 | ➡ | 1 | 2 | 3 |
| 体重増減 | ➡ | 1 | 2 | 3 |
| 睡眠障害（寝付きが悪い、よく眠れない、朝早く目が覚めてしまう） | ➡ | 1 | 2 | 3 |
| 焦燥感（イライラする､落ち着かない） | ➡ | 1 | 2 | 3 |
| 精神機能の抑制（考えるのが遅くなる） | ➡ | 1 | 2 | 3 |
| 運動性の抑制（身体の動きが遅くなる） | ➡ | 1 | 2 | 3 |
|  |  | ほとんど確認していない | 一部の患者に確認している | ほぼ全例に確認している |
| 疲労感・気力の減退（とても疲れやすい、気力がない） | ➡ | 1 | 2 | 3 |
| 性欲減退 | ➡ | 1 | 2 | 3 |
| 罪悪感・無価値観（自分が悪い、価値が無いと感じる） | ➡ | 1 | 2 | 3 |
| 集中力の低下（物事に集中することが難しくなる） | ➡ | 1 | 2 | 3 |
| 思考力の低下（物事を考えることが難しくなる） | ➡ | 1 | 2 | 3 |
| 決断困難（計画や意思決定をすることができない） | ➡ | 1 | 2 | 3 |
| 物忘れ（物事を覚えていることができない） | ➡ | 1 | 2 | 3 |
| 身体症状（腹部不快感･腸機能障害､疲労感､全身の痛み） | ➡ | 1 | 2 | 3 |
| 自殺念慮 | ➡ | 1 | 2 | 3 |
|  |  | ほとんど確認していない | 一部の患者に確認している | ほぼ全例に確認している |

＊＊＊＊＊PAGE END＊＊＊＊＊

・SA

・ランダム

高齢者のうつ状態に伴う**認知機能障害**について、**最もあてはまるもの**をお選びください。

1. 診断時に認知症と鑑別している
2. 正確な鑑別までは行かないものの、大うつ病の症状として意識している
3. あまり意識していない

＊＊＊＊＊PAGE END＊＊＊＊＊

・SA

**大うつ病の診察について伺います。**

大うつ病患者さんの受診間隔として、実臨床で**最も多いパターン**をお選びください。

|  | 急性期 | 維持期 |
| --- | --- | --- |
|  | ⇩ | ⇩ |
| 週1回以上 | 1 | 1 |
| 2週に1回 | 2 | 2 |
| 月1回 | 3 | 3 |
| 2ヶ月に1回 | 4 | 4 |
| 3ヶ月に1回以下 | 5 | 5 |

＊＊＊＊＊PAGE END＊＊＊＊＊

・SA

大うつ病患者さんの診察時間として、実臨床で**最も多いパターン**をお選びください。

また、正確な診断や評価のために必要とされる**理想の**診察時間をお選びください。

*診察室内での時間でお考えください（診察室外での検査等は除く）

|  | 初診 | | 再診 | |
| --- | --- | --- | --- | --- |
|  | 最も多いパターン | 理想 | 最も多いパターン | 理想 |
|  | ⇩ | ⇩ | ⇩ | ⇩ |
| 1分程度 | 1 | 1 | 1 | 1 |
| 3分程度 | 2 | 2 | 2 | 2 |
| 5分程度 | 3 | 3 | 3 | 3 |
| 10分程度 | 4 | 4 | 4 | 4 |
| 15分程度 | 5 | 5 | 5 | 5 |
| 20分程度 | 6 | 6 | 6 | 6 |
| 30分程度 | 7 | 7 | 7 | 7 |
| 45分程度 | 8 | 8 | 8 | 8 |
| 1時間以上 | 9 | 9 | 9 | 9 |

＊＊＊＊＊PAGE END＊＊＊＊＊

・SA

・理想≥最も多いパターン

先生ご自身が診断した大うつ病患者さんを100%とした場合、

診断が途中で**大うつ病以外の**精神疾患に変更となる割合をお答えください。

| 自身が診断した大うつ病患者 | 100% |
| --- | --- |
|  | ⇩ |
| 診断が途中で  大うつ病以外の精神疾患に変更となる割合 | Q20% |

＊＊＊＊＊PAGE END＊＊＊＊＊

・NA

・診断が途中で大うつ病以外の精神疾患に変更となる割合≤100

**大うつ病の治療について伺います。**

臨床心理士によるカウンセリング（臨床心理面接）を受けている患者数をお答えください。

| 1ヶ月の大うつ病患者数 | Q2-2再掲人／月 |
| --- | --- |
|  | ⇩ |
| 臨床心理士による  カウンセリング（臨床心理面接）を受けている患者数 | Q21人／月 |

- 施設に臨床心理士は在籍していない

＊＊＊＊＊PAGE END＊＊＊＊＊

・NA or MA

・臨床心理士によるカウンセリングを受けている患者数≤1ヶ月の大うつ病患者数

臨床心理士によるカウンセリング（臨床心理面接）は、いつまで行われますか？

**最も多いパターン**をお選びください。

1. 急性期が過ぎるまで
2. 回復期が過ぎるまで
3. 維持期の間も行う
4. 分からない

＊＊＊＊＊PAGE END＊＊＊＊＊

・SA

・対象はQ21「施設に臨床心理士は在籍していない」**以外**

抗うつ薬を処方している患者数をお答えください。

| 1ヶ月の大うつ病患者数 | Q2-2再掲人／月 |
| --- | --- |
|  | ⇩ |
| 抗うつ薬を処方している患者数 | Q23人／月 |

＊＊＊＊＊PAGE END＊＊＊＊＊

・NA

・抗うつ薬を処方している患者数≤1ヶ月の大うつ病患者数

治療抵抗性の患者数をお答えください。

| 1ヶ月の大うつ病患者数 | Q2-2再掲人／月 |
| --- | --- |
|  | ⇩ |
| 治療抵抗性の患者数 | Q24人／月 |

（参考）抗うつ薬を処方している患者数：　**Q23再掲人／月**

＊＊＊＊＊PAGE END＊＊＊＊＊

・NA

・治療抵抗性の患者数≤1ヶ月の大うつ病患者数

抗うつ薬開始時の薬物に関する説明は**主に**どなたがされますか？

最もあてはまるものをお選びください。

1. 先生ご自身
2. 薬剤師
3. 看護師
4. その他（　　　　　）

＊＊＊＊＊PAGE END＊＊＊＊＊

・SA

抗うつ薬を開始するうつ病患者さんを100%とした場合、

服薬アドヒアランスが良好に保たれる割合をお答えください。

| 薬物療法を開始するうつ病患者 | 100% |
| --- | --- |
|  | ⇩ |
| 服薬アドヒアランスが良好に保たれる割合 | Q26% |

- 分からない／想像つかない

＊＊＊＊＊PAGE END＊＊＊＊＊

・NA or MA

・服薬アドヒアランスが良好に保たれる割合≤100

以下の内容は先生にあてはまりますか？

|  |  | いいえ | はい |
| --- | --- | --- | --- |
| 他疾患を含めた服用薬剤数を把握している | ➡ | 1 | 2 |
| 抗うつ薬単独では効果不十分な場合に、抗うつ薬の併用療法を行っている | ➡ | 1 | 2 |
| 仕事の内容や運転の有無で処方を変えている | ➡ | 1 | 2 |
| 診察時に抗うつ薬の残薬の有無を確認している | ➡ | 1 | 2 |
| 抗うつ薬単独では効果不十分な場合に、大うつ病の治療に増強療法（抗精神病薬やリチウム等）を行っている | ➡ | 1 | 2 |
|  |  | いいえ | はい |

＊＊＊＊＊PAGE END＊＊＊＊＊

・SA

・ランダム

**最後に、先生のお考えを伺います。**

大うつ病の**診療**における課題について、先生の同意度をお選びください。

|  |  | 同意しない | どちらともいえない | 同意する |  | 分からない |
| --- | --- | --- | --- | --- | --- | --- |
| うつ病と他の精神疾患の鑑別は困難である | ➡ | 1 | 2 | 3 |  | 4 |
| 正確な診断に必要な時間を確保できない | ➡ | 1 | 2 | 3 |  | 4 |
| 心理検査の種類が多すぎるので統一してほしい | ➡ | 1 | 2 | 3 |  | 4 |
| 診断基準が判断を誤らせる可能性がある | ➡ | 1 | 2 | 3 |  | 4 |
| 個別症状の把握は臨床的印象だけでは不十分である | ➡ | 1 | 2 | 3 |  | 4 |
| うつ病に対する啓発は未だ不十分である | ➡ | 1 | 2 | 3 |  | 4 |
| うつ病による認知機能障害の改善は復職の重要な要因である | ➡ | 1 | 2 | 3 |  | 4 |
|  |  | 同意しない | どちらともいえない | 同意する |  | 分からない |

＊＊＊＊＊PAGE END＊＊＊＊＊

・SA

・ランダム
